# Supplementary material for: Epitaxial growth of orthorhombic NaTaO3crystals on SrTiO3(100) surface by flux coating
Source: Royal Society of Chemistry journal article supplement (doi:10.1039/c5ce01903f), 2015-01-01
Supplement: c5ce01903f1.pdf [file c5ce01903f1.pdf]

*Electronic Supplementary Information (ESI)*

**Epitaxial growth of orthorhombic NaTaO<sub>3</sub> crystals on SrTiO<sub>3</sub> (100) surface by flux coating**

Sayaka Suzuki,<sup>a</sup> Hajime Wagata,<sup>a</sup> Kunio Yubuta,<sup>b</sup> Shuji Oishi,<sup>a</sup> Katsuya Teshima<sup>\*,a,c</sup>

<sup>a</sup> Department of Environmental Science and Technology, Faculty of Engineering, Shinshu University, 4-17-1 Wakasato, Nagano 380-8553, Japan

<sup>b</sup> Institute for Materials Research, Tohoku University, 2-1-1 Katahira, Aoba-ku, Sendai 980-8577, Japan

<sup>c</sup> Center for Energy and Environmental Science, Shinshu University, 4-17-1 Wakasato, Nagano 380-8553, Japan

*E-mail: teshima@shinshu-u.ac.jp*

*\*Corresponding Author: Katsuya Teshima*

## Experimental

NaTaO<sub>3</sub> crystals were grown on a single-crystalline SrTiO<sub>3</sub> (100) substrate in a two-step process: sputter deposition of a tantalum oxide (TaO<sub>x</sub>) thin film as a Ta source for NaTaO<sub>3</sub>, and its subsequent conversion into NaTaO<sub>3</sub>. First, a TaO<sub>x</sub> thin film was deposited on the SrTiO<sub>3</sub> (100) substrate (10 × 10 × 0.5 mm<sup>3</sup>, Shinkosha Co., Ltd.) by sputtering, using Ta (Furuya Metal Co., Ltd.) as a target and a simple magnetron sputtering system (JFC-1600, JEOL) under an Ar atmosphere. Next, a 2 M NaNO<sub>3</sub> solution was prepared using reagent-grade NaNO<sub>3</sub> powder (99.0%, Wako Pure Chemical Industries, Ltd.); 10 μL of this solution was placed on the TaO<sub>x</sub>/SrTiO<sub>3</sub>, which had been dry-cleaned and hydrophilized by irradiation under vacuum-ultraviolet light ( $\lambda = 172$  nm) from a xenon excimer lamp (UER172-200, Ushio Inc.). The solution-coated TaO<sub>x</sub>/SrTiO<sub>3</sub> was dried in an electric oven at 100 °C for 30 min. The substrates were placed in a Pt case and covered with an alumina plate. The Pt case was heated to 600 °C at a rate of 100 °C·min<sup>-1</sup> in an infrared heating furnace and then naturally cooled to room temperature in the furnace without holding the temperature. The products were immersed in warm water to remove any residual NaNO<sub>3</sub>.

The TaO<sub>x</sub>/SrTiO<sub>3</sub> and NaTaO<sub>3</sub>/SrTiO<sub>3</sub> samples were examined by field-emission scanning electron microscopy (FESEM; SU8000, Hitachi) and transmission electron microscopy (TEM; EM-002B, Topcon and JEM-2010, JEOL). The elemental composition was investigated using an X-ray photoelectron spectrometer (XPS; JPS-9010MX, JEOL), energy-dispersive X-ray spectrometer (EDS; attached to a transmission electron microscope/scanning transmission electron microscope (TEM/STEM; JEM-2800, JEOL)), and X-ray diffractometer (XRD; SmartLab and MiniflexII, Rigaku) with Cu-K $\alpha$  radiation ( $\lambda = 0.154$  nm). The samples for cross-sectional observations were prepared using a focused ion beam (FIB) system (JIB-4000, JEOL).

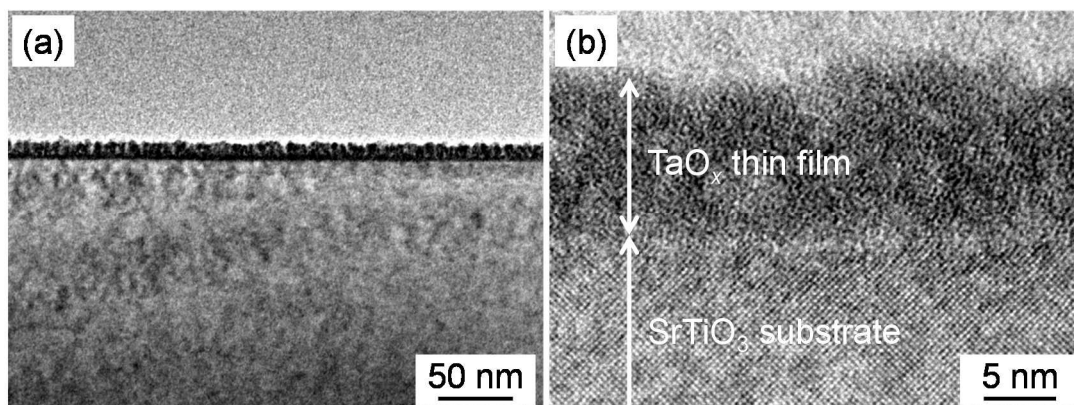

Figure S1. (a) Low- and (b) high-magnification cross-sectional TEM images of TaO<sub>x</sub>/SrTiO<sub>3</sub>.

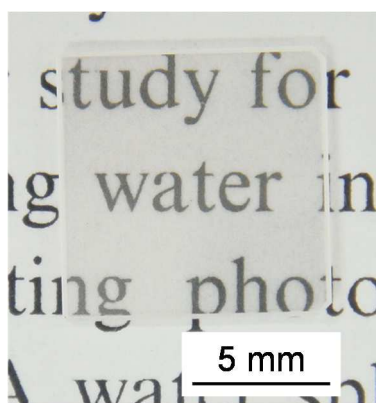

Figure S2. (a) Digital photograph of TaO<sub>x</sub>/SrTiO<sub>3</sub>.

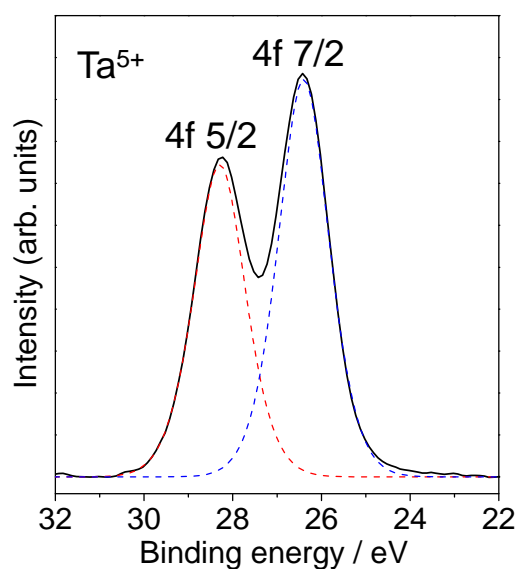

Figure S3. XPS spectra of TaO<sub>x</sub> thin film deposited on an Al<sub>2</sub>O<sub>3</sub> substrate. The TaO<sub>x</sub> thin film was also deposited on a sapphire substrate at the same time with a SrTiO<sub>3</sub> substrate.

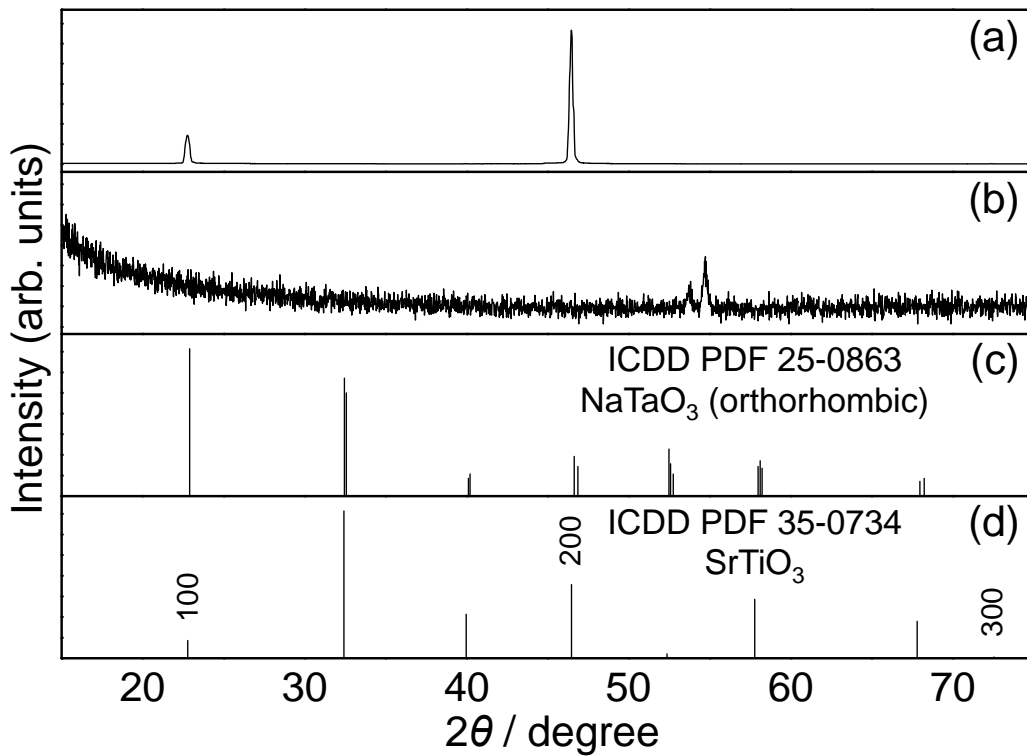

Figure S4. (a) XRD pattern obtained from  $2\theta/\theta$  scan of NaTaO<sub>3</sub>/SrTiO<sub>3</sub>. (b) XRD pattern obtained from  $2\theta$  scan ( $\omega = 1.0^\circ$ ) of the SrTiO<sub>3</sub> substrate. XRD patterns of (c) NaTaO<sub>3</sub> (ICDD PDF data) and (d) SrTiO<sub>3</sub> (ICDD PDF data).

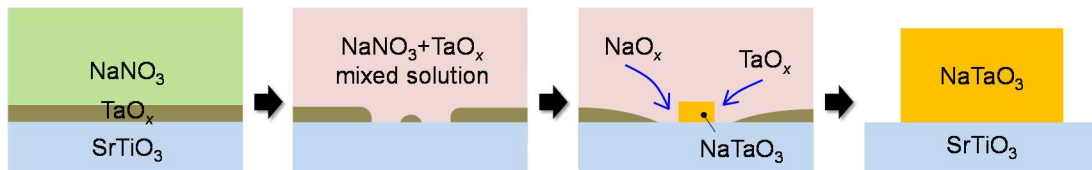

Figure S5. Illustrations of the growth mechanism of NaTaO<sub>3</sub> crystals from NaNO<sub>3</sub> and TaO<sub>x</sub>/SrTiO<sub>3</sub>. This figure shows the growth mechanism of epitaxially grown NaTaO<sub>3</sub> crystals rather than non-oriented ones.

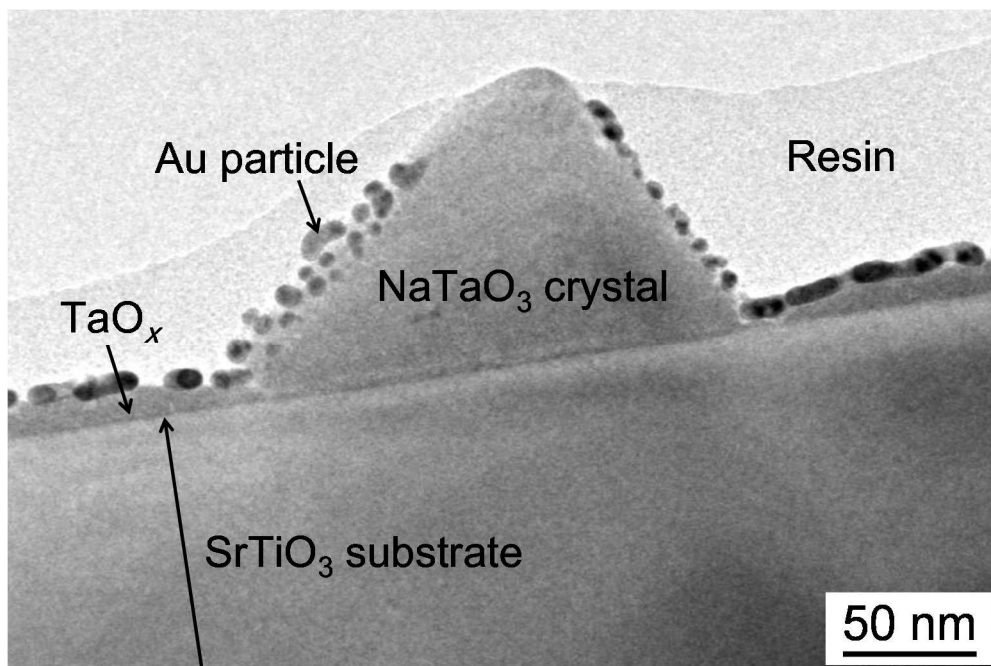

Figure S6. Cross-sectional TEM image of a disordered  $\text{NaTaO}_3$  crystal grown on  $\text{SrTiO}_3$  substrate. Au particles were deposited on  $\text{NaTaO}_3/\text{SrTiO}_3$  before TEM observation in order to prevent the charging.

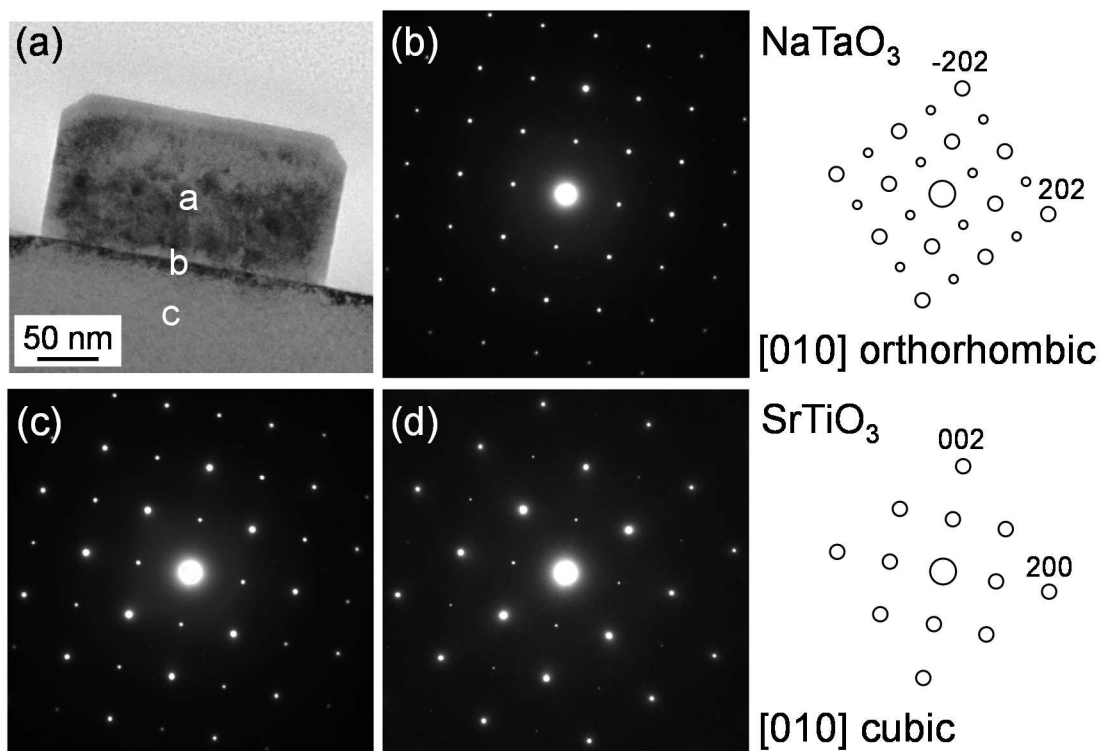

Figure S7. (a) Bright-field TEM image and (b–d) the corresponding SAED patterns of  $\text{NaTaO}_3/\text{SrTiO}_3$ . The incident electron beam was parallel to the  $[010]$  direction of  $\text{SrTiO}_3$ .

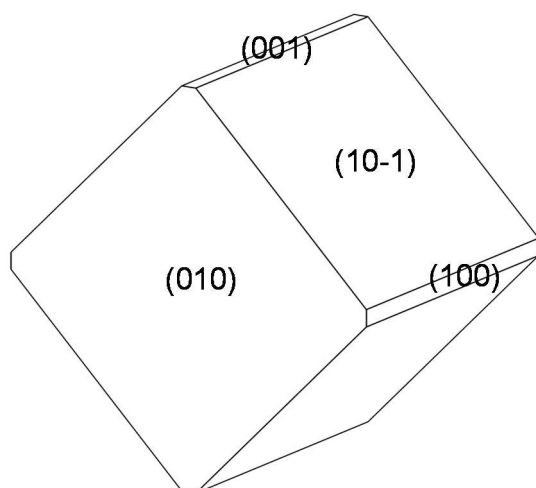

Figure S8. Schematic illustration of NaTaO<sub>3</sub> crystal bounded by {010}, {10-1}, {001}, and {100} faces.

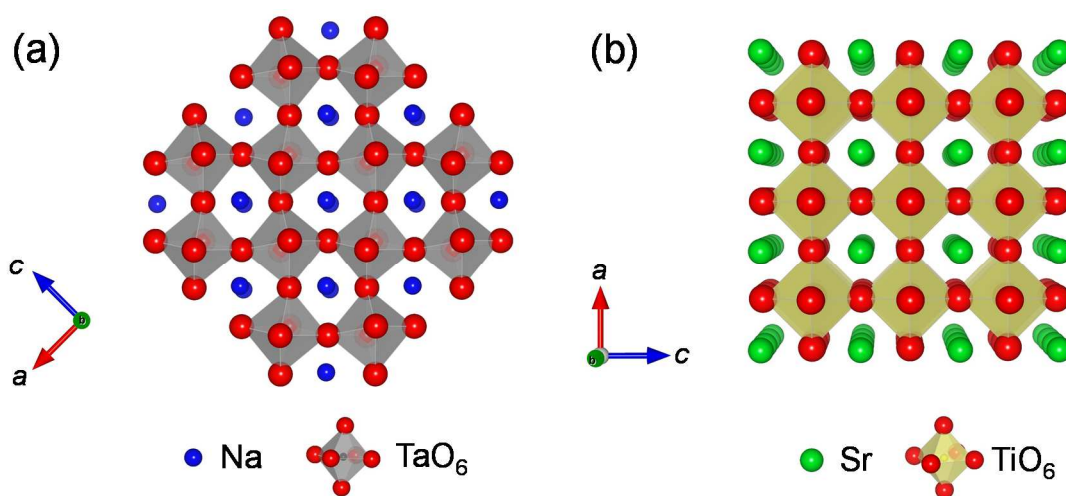

Figure S9. Schematic crystal structures of orthorhombic NaTaO<sub>3</sub> and cubic SrTiO<sub>3</sub>.

NaTaO<sub>3</sub>\_Na-O

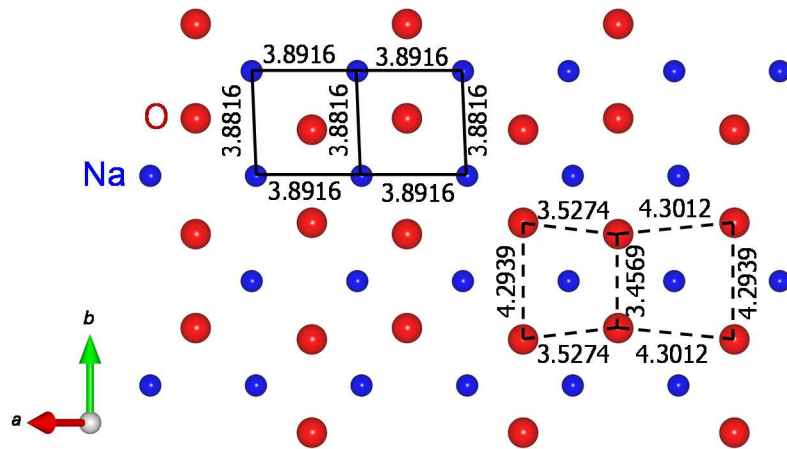

NaTaO<sub>3</sub>\_Ta-O

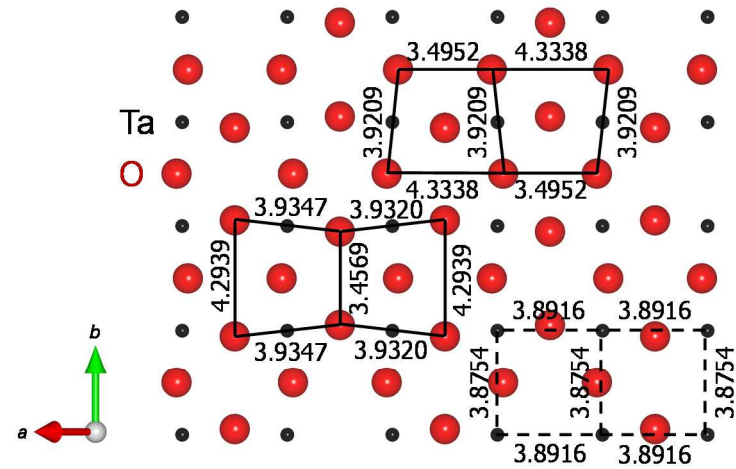

SrTiO<sub>3</sub>\_Ti-O

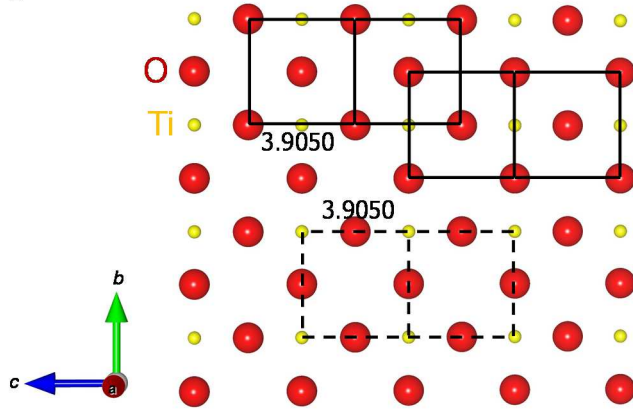

All distances of Ti-Ti and O-O are 3.9050 Å.

SrTiO<sub>3</sub>\_Sr-O

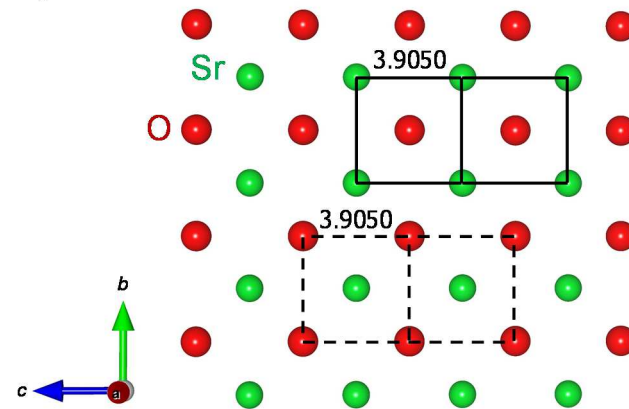

All distances of Sr-Sr and O-O are 3.9050 Å.

Figure S10. Schematic crystal structures of orthorhombic NaTaO<sub>3</sub> (10-1) face and cubic SrTiO<sub>3</sub> (100) face.
